# Supplementary material for: The La protein counteracts cisplatin-induced cell death by stimulating protein synthesis of anti-apoptotic factor Bcl2
Source: PubMed Central journal article supplement (PMC5045424; doi:10.18632/oncotarget.8819), 2016-04-18
Supplement: oncotarget-07-29664-s001.pdf [file oncotarget-07-29664-s001.pdf]

SUPPLEMENTARY FIGURES

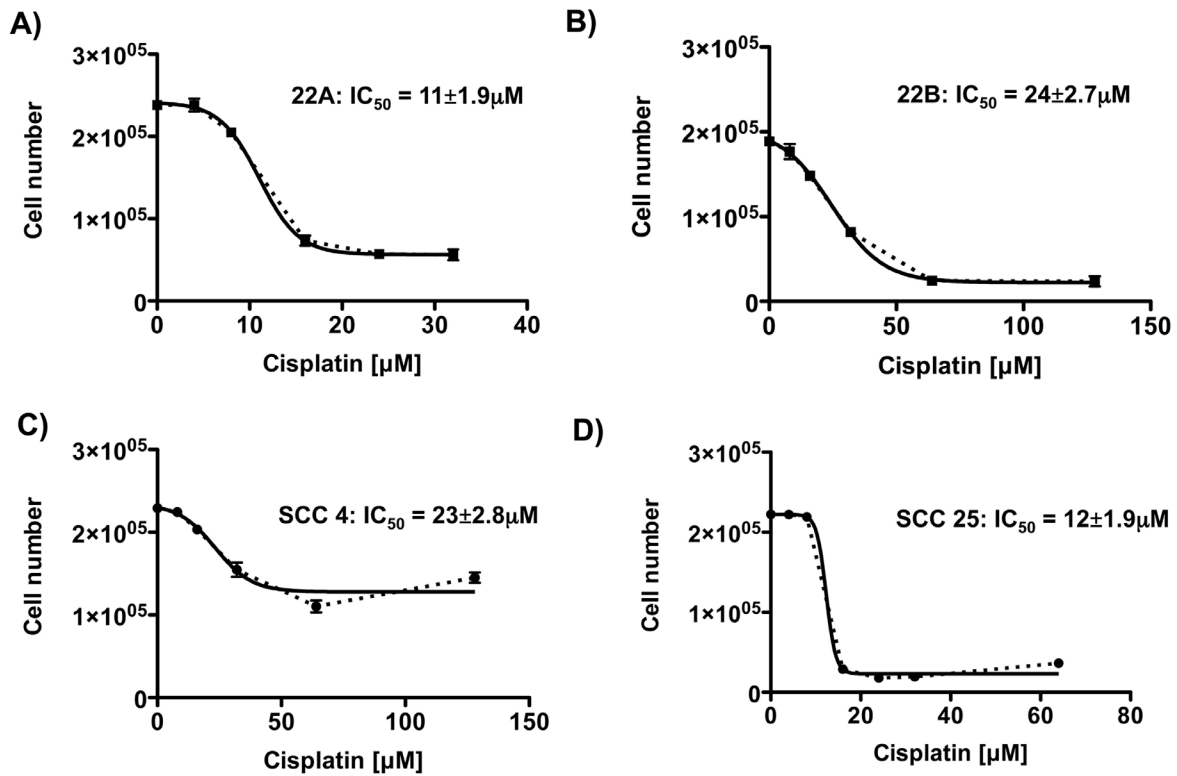

**Supplementary Figure S1: Cisplatin  $IC_{50}$  of four different HNSCC cell lines.** A. SCC 22A ( $IC_{50} = 11 \pm 1.9 \mu M$ ), B. SCC 22B ( $IC_{50} = 24 \pm 2.7 \mu M$ ), C. SCC 4 ( $IC_{50} = 23 \pm 2.8 \mu M$ ), and D. SCC 25 ( $IC_{50} = 12 \pm 1.9 \mu M$ ). At least two independent experiments were performed in triplicates. The  $IC_{50}$  values were calculated applying Prism 5 (GraphPad Software).

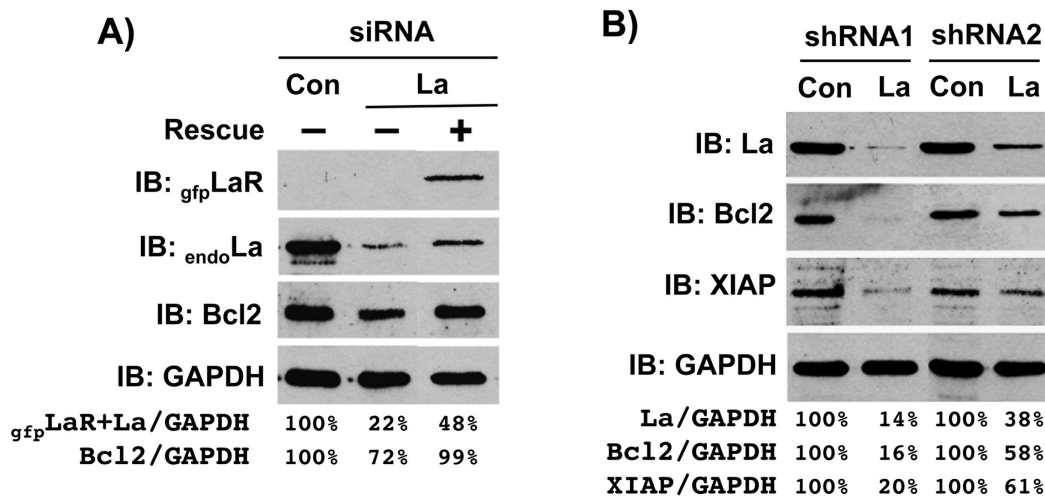

**Supplementary Figure S2: A.** Bcl2 protein expression can be rescued in La-depleted (La siRNA) SCC 22B cells by overexpressing  $gfp$ -tagged La resistant to La-specific siRNA ( $gfp$ LaR). GAPDH was used as loading control. Con = control siRNA. **B.** Bcl2 and XIAP protein expression is reduced in SCC 22B cells transduced with two independent La-specific shRNAs. For quantification of immunoblot (IB) signals an ImageQuant ECL system and the ImageQuant TL software was used.

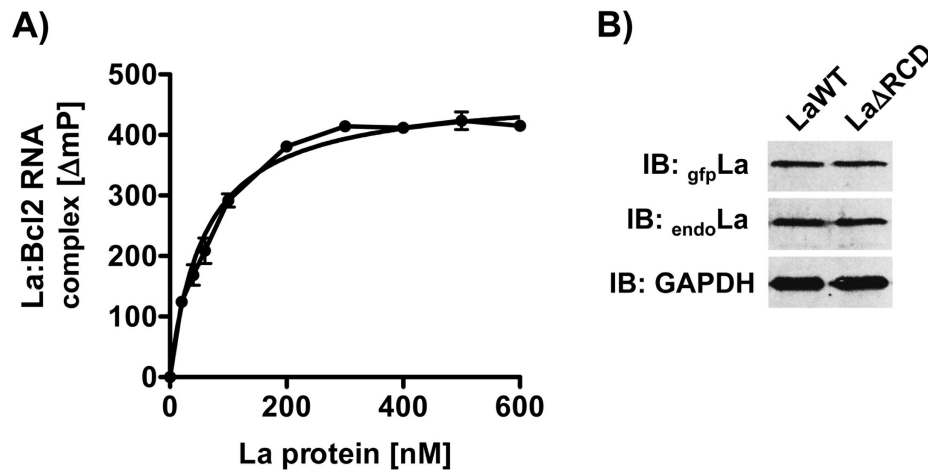

**Supplementary Figure S3:** A. Binding affinity for the La:Bcl2 RNA interaction as determined by fluorescence polarization assays. The La:RNA complex formation as difference in polarization ( $\Delta mP$ ) was plotted against the La protein concentration. The  $K_d$  was determined as  $60.1 \pm 4.5$  nM ( $n=6$ ) in Prism 5 (GraphPad Software). B. immunoblot (IB) analysis to validate equal expression of La wildtype (LaWT) and La RNA chaperone domain (La $\Delta$ RCD) mutant in SCC 22B cells.

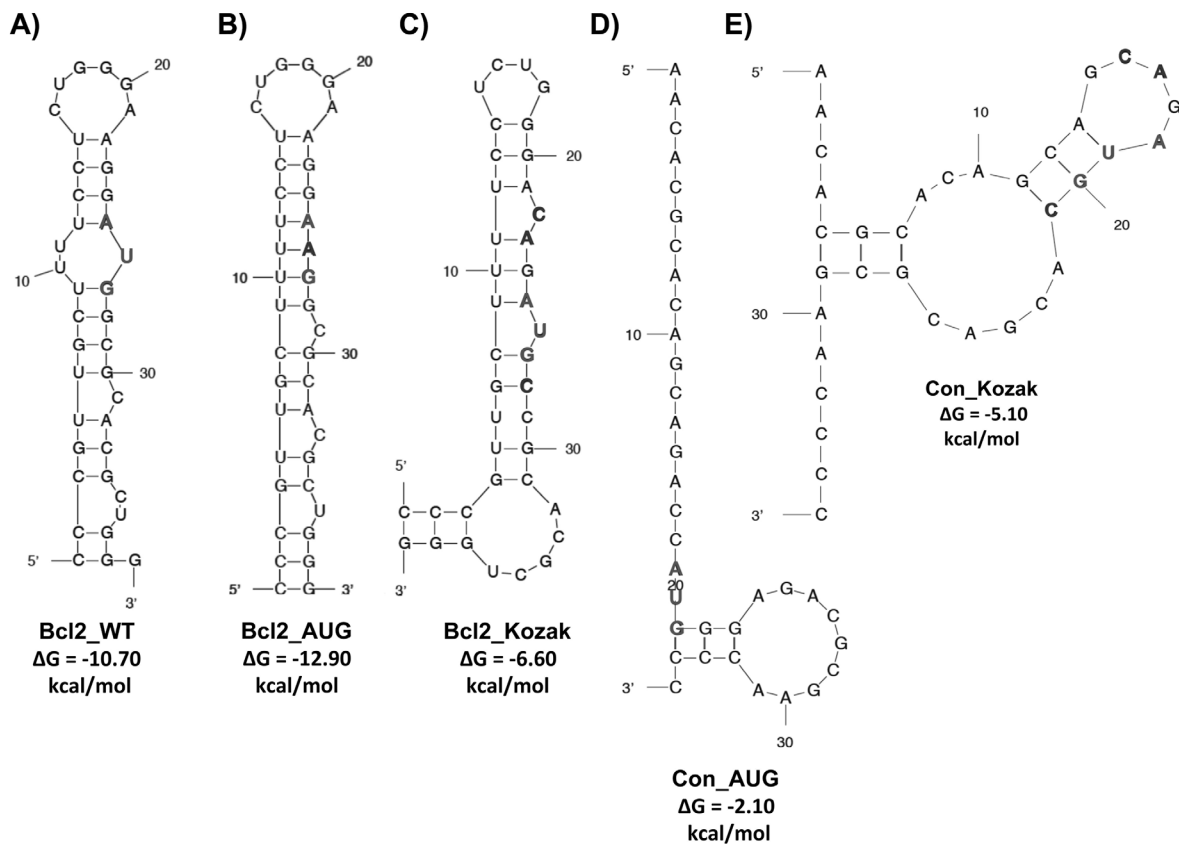

**Supplementary Figure S4:** Secondary structure of Bcl2 RNA oligonucleotides and two unrelated control (Con) RNA oligonucleotides as determined by applying the RNA Folding Form available on the mfold Web Server (<http://mfold.rna.albany.edu/?q=mfold>, The RNA Institute, Albany, USA) [50]. A. Bcl2\_WT, B. Bcl2\_AUG, C. Bcl2\_Kozak, D. Con\_AUG, and E. Con\_Kozak.
